# Supplementary material for: Glucocorticoid receptor in stromal cells is essential for glucocorticoid-mediated suppression of inflammation in arthritis
Source: PubMed Central journal article supplement — Ann Rheum Dis. 2018 Jul 11;77(11):1610–8. doi: 10.1136/annrheumdis-2017-212762 (PMC6225806; doi:10.1136/annrheumdis-2017-212762), 2018-07-11
Supplement: annrheumdis-2017-212762supp001.pdf [file annrheumdis-2017-212762supp001.pdf]

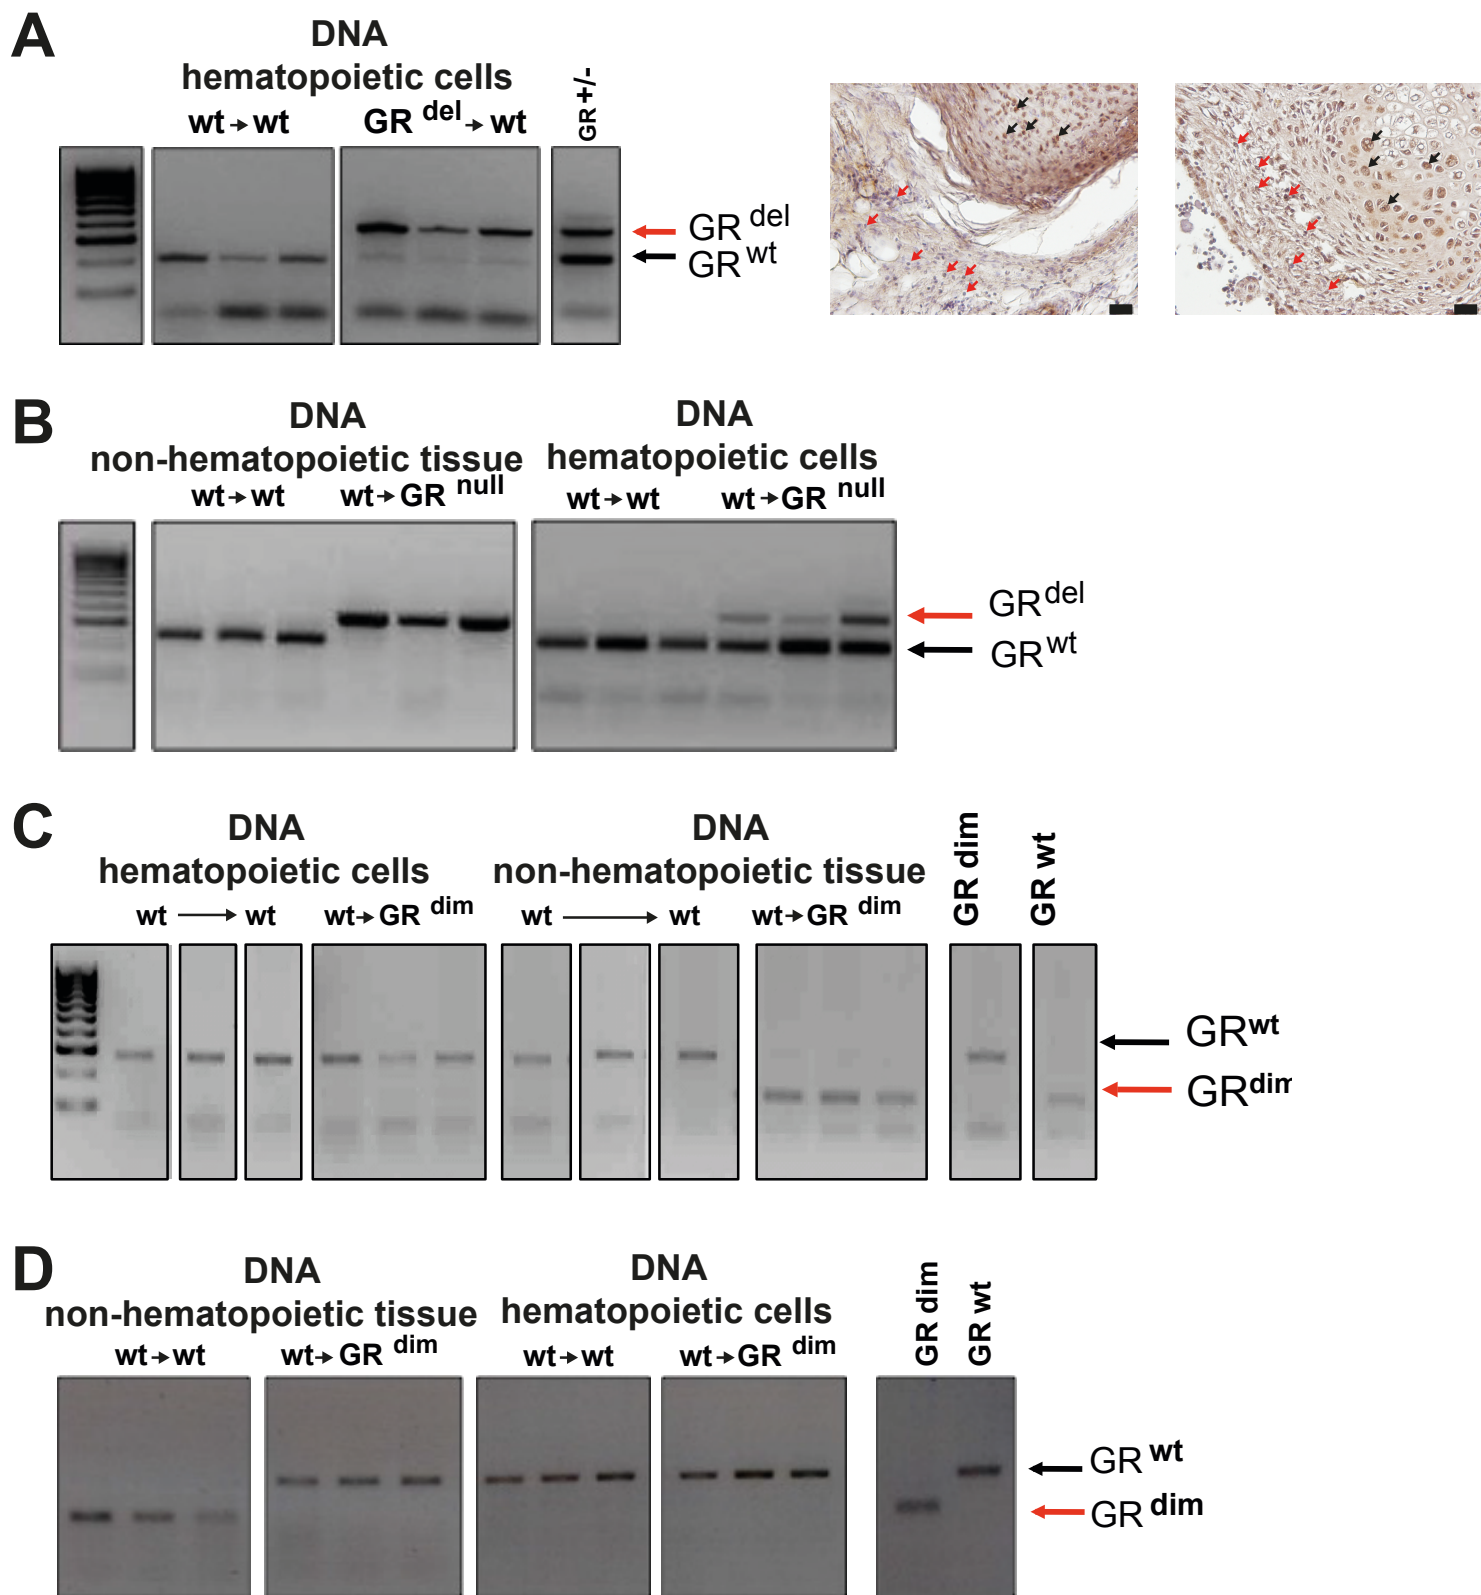

**Supplement Figure 1 Transplantation efficiency in GR bone marrow chimeras**

(A) Level of GR deletion determined by genomic DNA PCR of hematopoietic cells (full blood) of wt → wt and GR<sup>del</sup> → wt mice (left) and by immunohistochemistry for GR (right; red arrows indicate infiltrating cells, black arrows indicate chondrocytes). Three mice per group are displayed. (B) GR deletion in non-hematopoietic tissue (ear) and hematopoietic cells (full blood) of wt → wt and w → GR<sup>null</sup> mice determined by PCR of genomic DNA. Three representative mice per group are displayed. (C) GR dimer-mutation analysis in non-hematopoietic tissue (ear) and hematopoietic cells (spleen) of wt → wt and wt → GR<sup>dim</sup> mice. Three representative mice per group are displayed. (D) GR dimer-mutation analysis of DNA of non-hematopoietic tissue (ear) and hematopoietic cells (spleen) of wt → wt and wt → GR<sup>dim</sup> mice. Three representative mice per group are displayed.
