# Supplementary material for: Glucocorticoid receptor in stromal cells is essential for glucocorticoid-mediated suppression of inflammation in arthritis
Source: PubMed Central journal article supplement — Ann Rheum Dis. 2018 Jul 11;77(11):1610–8. doi: 10.1136/annrheumdis-2017-212762 (PMC6225806; doi:10.1136/annrheumdis-2017-212762), 2018-07-11
Supplement: annrheumdis-2017-212762supp004.pdf [file annrheumdis-2017-212762supp004.pdf]

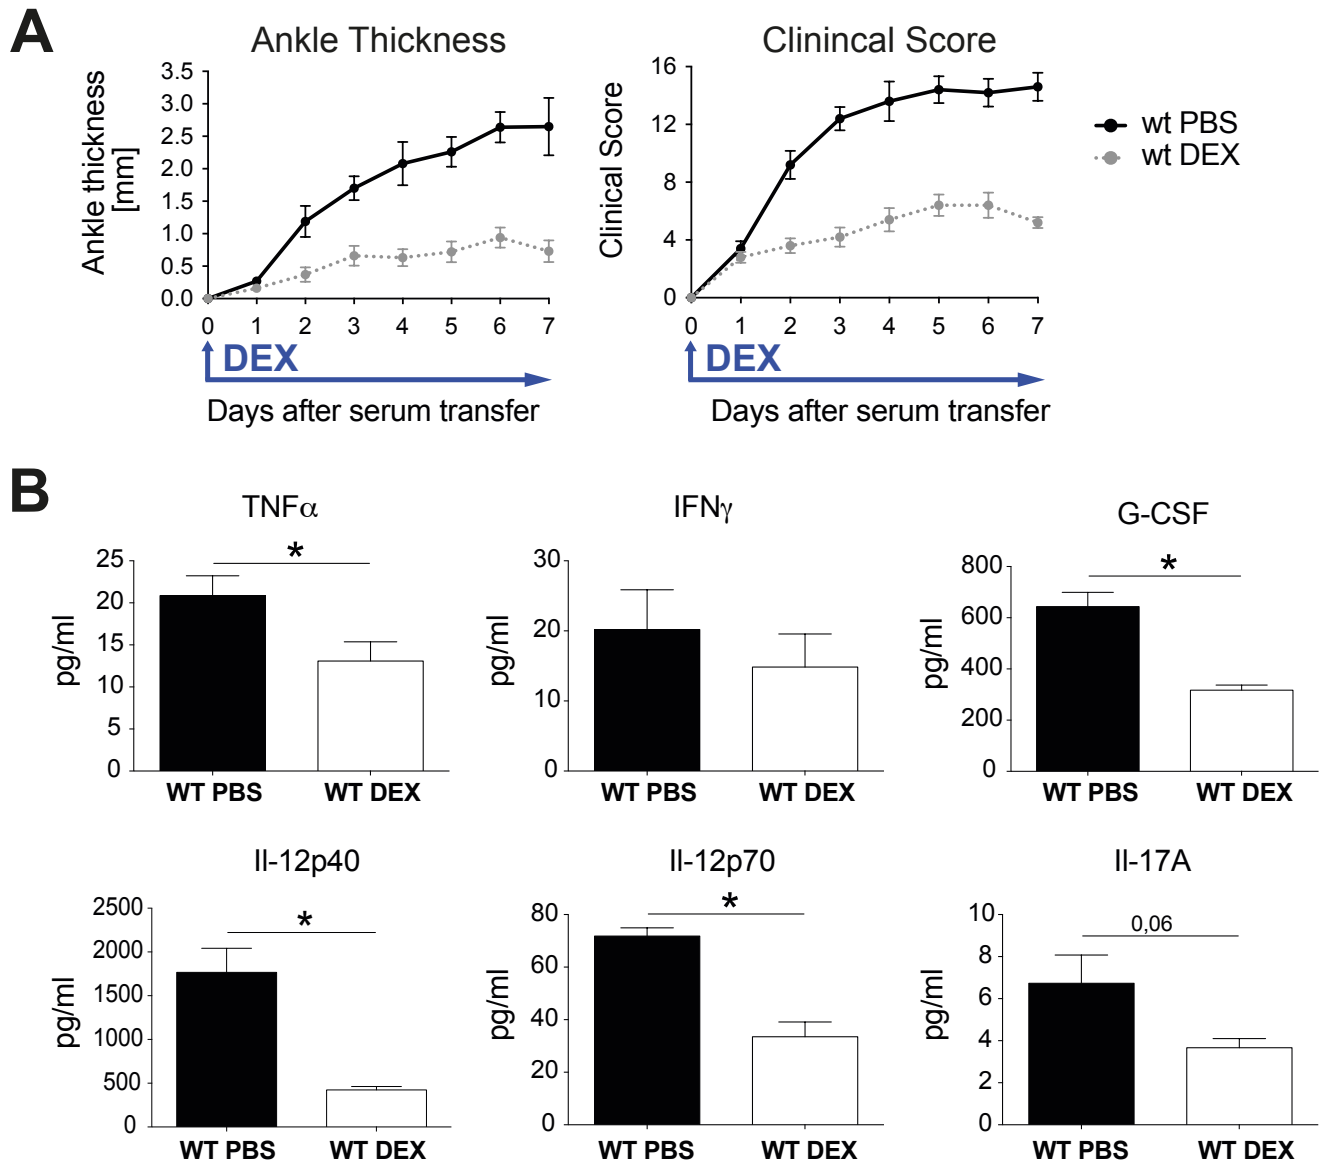

**Supplement Figure 4 Dexamethasone suppresses cytokines when co-treated with STIA induction but does not completely abrogate STIA development**

(A) Ankle thickness and clinical score of wt mice, co-treated at time of STIA induction (daily from day 0 to day 7) with PBS or Dexamethasone (DEX). (B) Serum cytokine levels are determined by multiplex analysis. Asterisks indicate significances \* $p \leq 0,05$ .  $n=5$  mice per group.
