# Supplementary material for: Glucocorticoid receptor in stromal cells is essential for glucocorticoid-mediated suppression of inflammation in arthritis
Source: PubMed Central journal article supplement — Ann Rheum Dis. 2018 Jul 11;77(11):1610–8. doi: 10.1136/annrheumdis-2017-212762 (PMC6225806; doi:10.1136/annrheumdis-2017-212762), 2018-07-11
Supplement: annrheumdis-2017-212762supp005.pdf [file annrheumdis-2017-212762supp005.pdf]

### Stained in Antibody Mix1

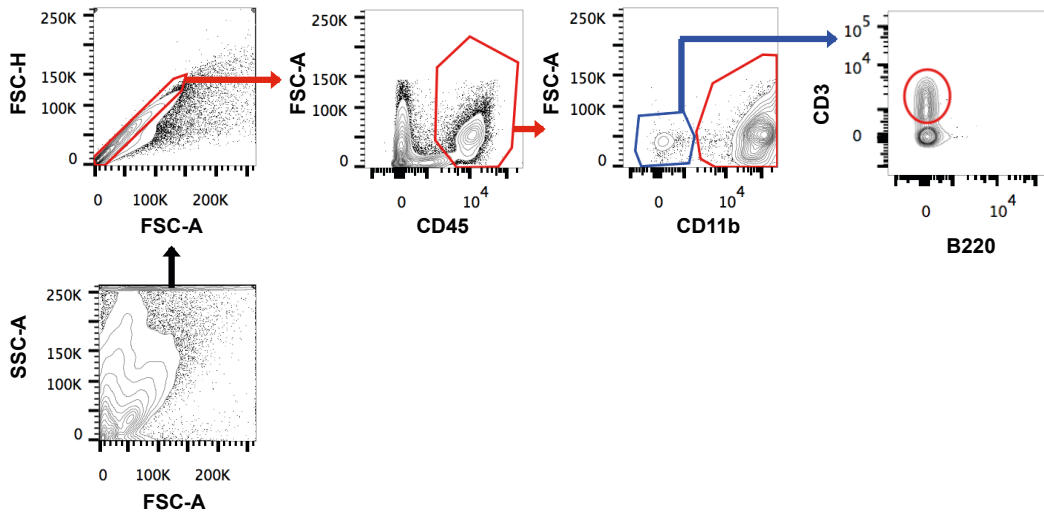

### Stained in Antibody Mix2

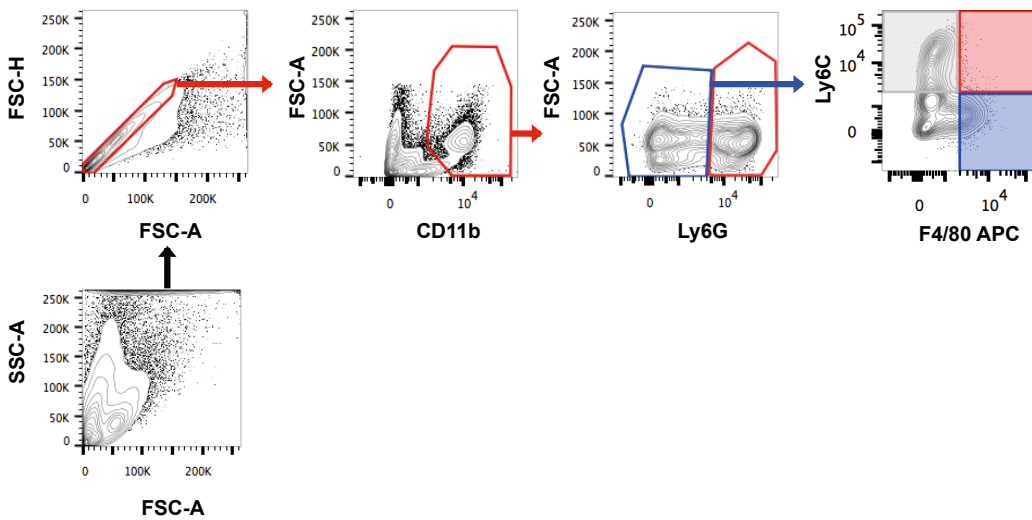

### Stained in Antibody Mix3

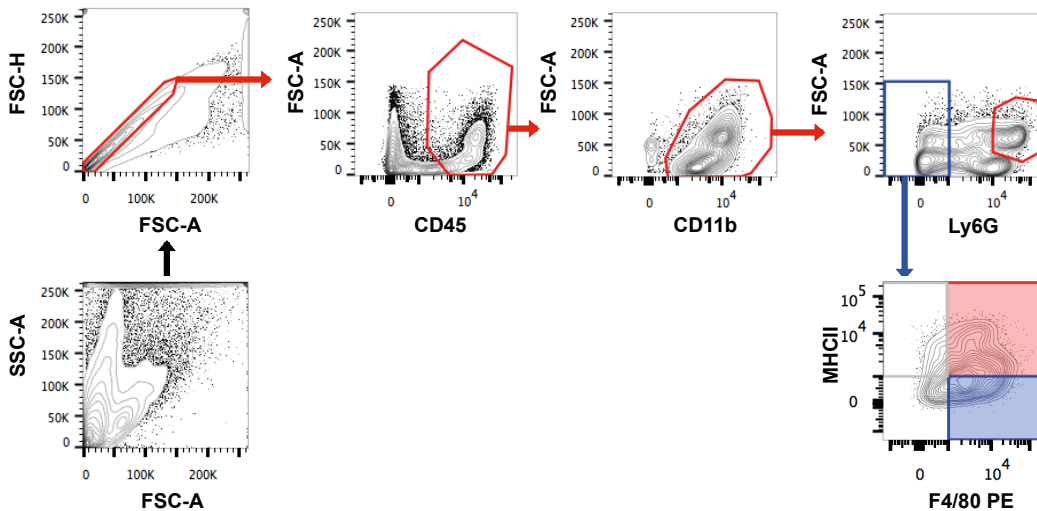

### Supplement Figure 5 Representative gating strategy for flow cytometry

Ankles of wt  $\rightarrow$  wt and wt  $\rightarrow$  GR<sup>dim</sup> mice were digested and stained with three different antibody mixes to be analysed by flow cytometry. Representative pictures of the gating strategy of the flow cytometry plots are shown (Plots of cells from a representative wt  $\rightarrow$  wt PBS treated mouse are displayed for all three mixes). Conjugates and antibodies are found in the supplementary methods part.
