# Supplementary material for: Glucocorticoid receptor in stromal cells is essential for glucocorticoid-mediated suppression of inflammation in arthritis
Source: PubMed Central journal article supplement — Ann Rheum Dis. 2018 Jul 11;77(11):1610–8. doi: 10.1136/annrheumdis-2017-212762 (PMC6225806; doi:10.1136/annrheumdis-2017-212762), 2018-07-11
Supplement: annrheumdis-2017-212762supp009.pdf [file annrheumdis-2017-212762supp009.pdf]

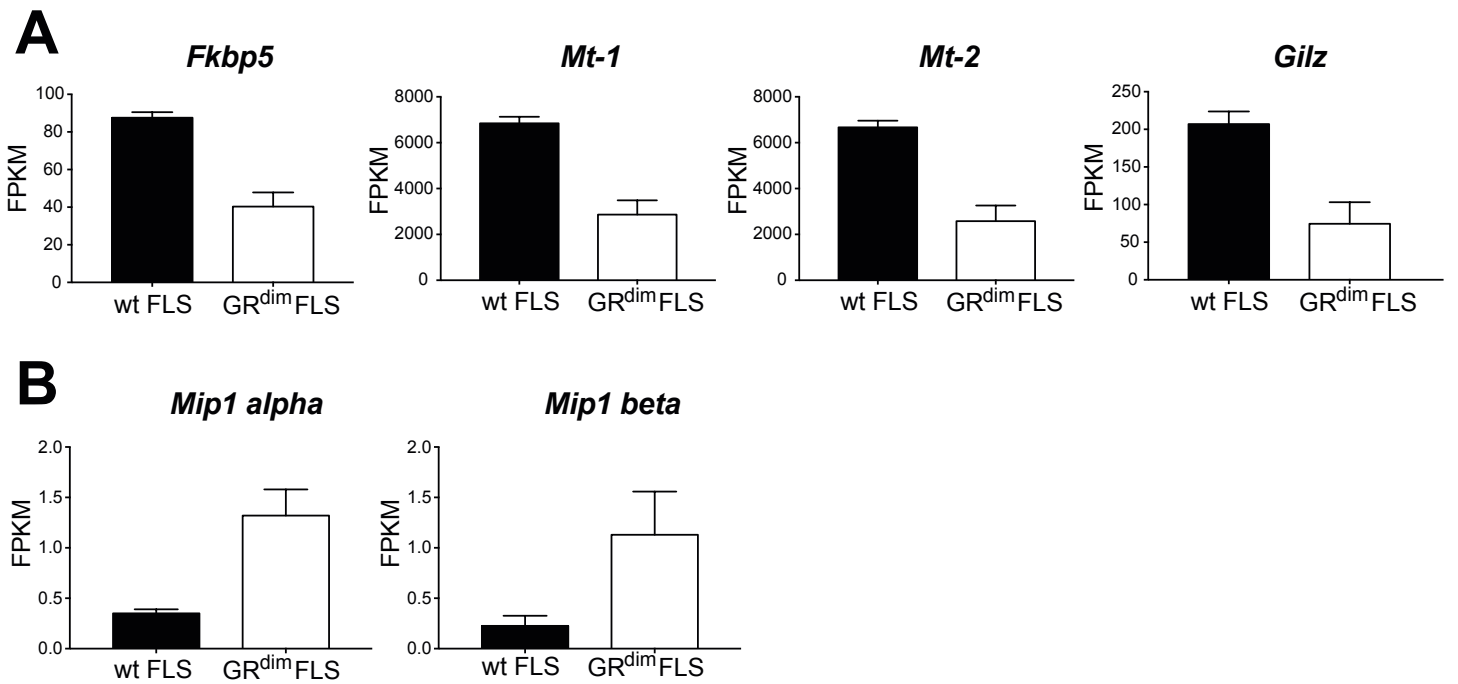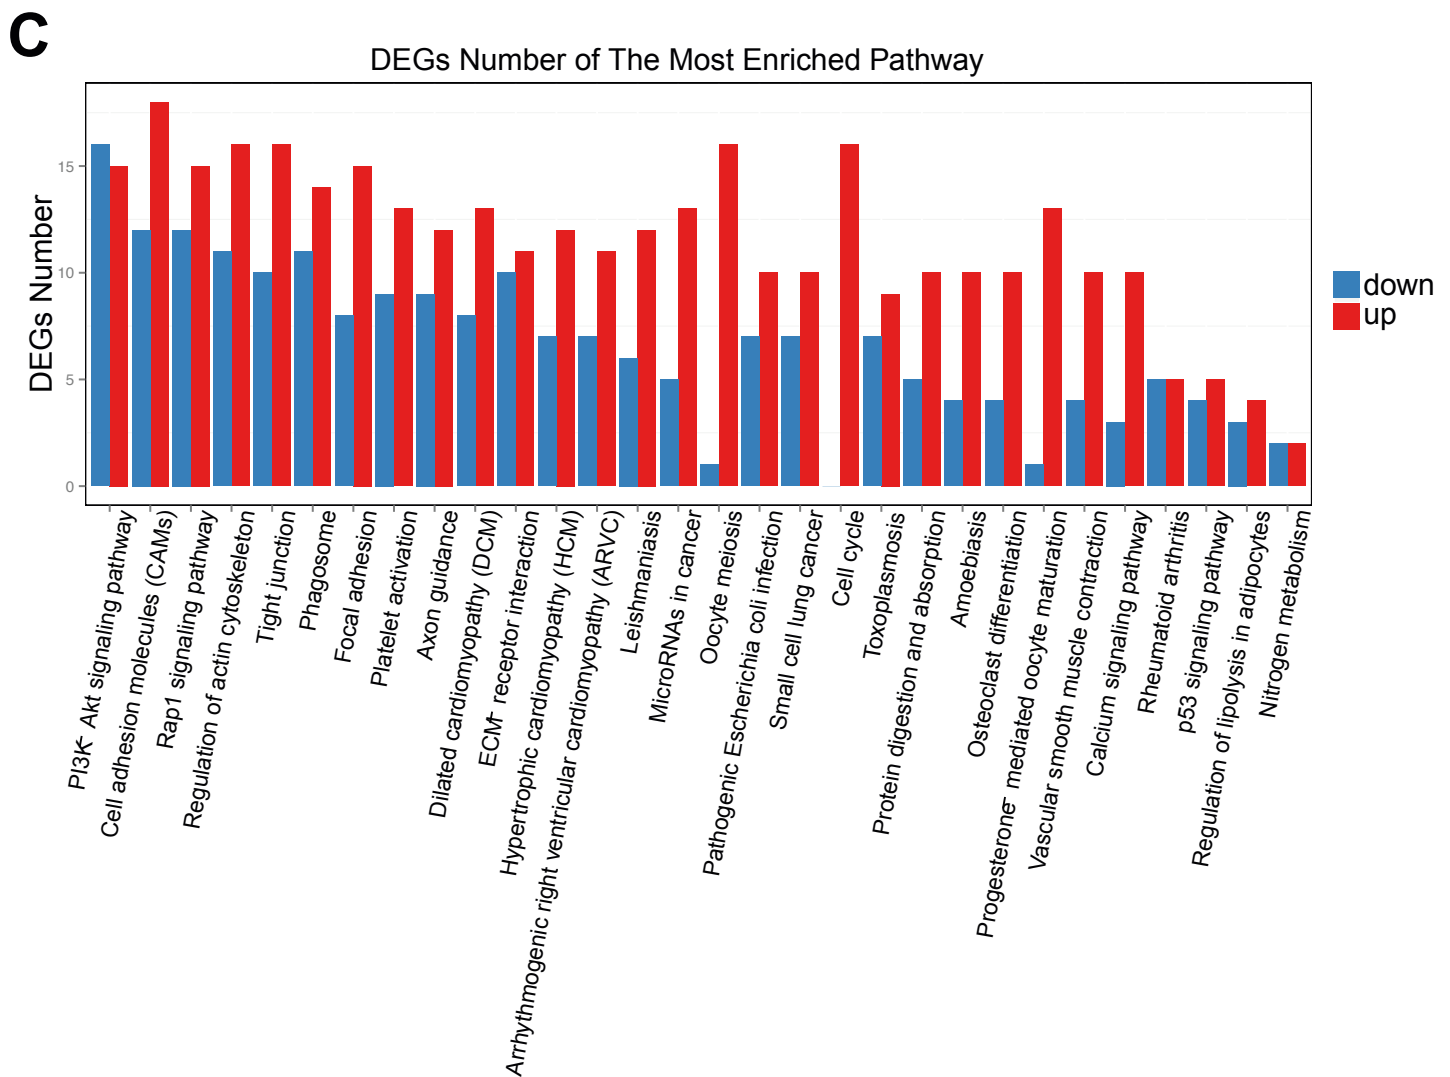

**Supplement Figure 9 GR<sup>dim</sup> FLS show a lack of induction of classical GC-target genes and fail to suppress Mip1- $\alpha$  and - $\beta$  and show enhanced gene expression involved in multiple pathways.**

(A) FPKM (Fragment Per Kilobase Million) of classical GC-target genes *Fkbp5*, *Mt* metallothionein-1 and -2 and Glucocorticoid-induced leucine zipper (*Gilz*) in wt and GR<sup>dim</sup> FLS (B) FPKM (Fragment Per Kilobase Million) of chemokines *Mip1*- $\alpha$  and - $\beta$  in wt and GR<sup>dim</sup> FLS. (C) Enriched KEGG pathways in wt versus GR<sup>dim</sup> FLS treated with  $\text{IL-1}\beta$  and Dexamethasone.
